# Supplementary material for: Transferring patients home to die: what is the potential population in UK critical care units?
Source: PubMed Central journal article supplement — BMJ Support Palliat Care. 2015 Dec 1;7(1):98–101. doi: 10.1136/bmjspcare-2014-000834 (PMC5339543; doi:10.1136/bmjspcare-2014-000834), 2015-12-01
Supplement: bmjspcare-2014-000834-s1.pdf [file bmjspcare-2014-000834-s1.pdf]

## Audit form

**Marie Curie Cancer Care study 'An investigation about transferring patients in critical care home to die: experiences, attitudes, population characteristics and practice'**

### General information

|                                                          |                                                       |                                                                     |                                                                                                                                                                                                          |
|----------------------------------------------------------|-------------------------------------------------------|---------------------------------------------------------------------|----------------------------------------------------------------------------------------------------------------------------------------------------------------------------------------------------------|
| Study ID                                                 | <input style="width: 100%;" type="text"/>             |                                                                     |                                                                                                                                                                                                          |
| Patient DOB                                              | <input style="width: 20px;" type="text"/>             | <input style="width: 20px;" type="text"/>                           | <input style="width: 50px;" type="text"/> (date)                                                                                                                                                         |
| Patient sex                                              | Male <input style="width: 20px;" type="checkbox"/>    | Female <input style="width: 20px;" type="checkbox"/>                |                                                                                                                                                                                                          |
| Area of residence                                        |                                                       |                                                                     |                                                                                                                                                                                                          |
| ITU/HDU                                                  | ITU <input style="width: 20px;" type="checkbox"/>     | HDU <input style="width: 20px;" type="checkbox"/>                   | ITU/HDU Combined <input style="width: 20px;" type="checkbox"/>                                                                                                                                           |
| ITU/HDU speciality                                       | General <input style="width: 20px;" type="checkbox"/> | Neuro <input style="width: 20px;" type="checkbox"/>                 | Cardiac <input style="width: 20px;" type="checkbox"/>                                                                                                                                                    |
|                                                          |                                                       | Oncology <input style="width: 20px;" type="checkbox"/>              | Other <input style="width: 20px;" type="checkbox"/>                                                                                                                                                      |
|                                                          |                                                       | Please specify: _____ <input style="width: 20px;" type="checkbox"/> |                                                                                                                                                                                                          |
| Level of care*                                           | 1 <input style="width: 20px;" type="checkbox"/>       | 2 <input style="width: 20px;" type="checkbox"/>                     | 3 <input style="width: 20px;" type="checkbox"/>                                                                                                                                                          |
| *Department of Health: Comprehensive Critical Care, 2000 |                                                       |                                                                     |                                                                                                                                                                                                          |
| What was the primary cause for admission?                |                                                       |                                                                     |                                                                                                                                                                                                          |
| What was the secondary cause for admission?              |                                                       |                                                                     |                                                                                                                                                                                                          |
| Other significant condition in past medical history      |                                                       |                                                                     |                                                                                                                                                                                                          |
| Date/time of withdrawal discussed with family            | <input style="width: 20px;" type="text"/>             | <input style="width: 20px;" type="text"/>                           | <input style="width: 50px;" type="text"/> (date) <input style="width: 20px;" type="text"/> <input style="width: 20px;" type="text"/> (time) <input style="width: 20px;" type="checkbox"/> not applicable |
| Date/time of death                                       | <input style="width: 20px;" type="text"/>             | <input style="width: 20px;" type="text"/>                           | <input style="width: 50px;" type="text"/> (date) <input style="width: 20px;" type="text"/> <input style="width: 20px;" type="text"/> (time)                                                              |

### STAGE 1: Sudden death

|                                |                                               |           |                |
|--------------------------------|-----------------------------------------------|-----------|----------------|
| Cardiac arrest or sudden death | <input style="width: 20px;" type="checkbox"/> | (details) | <b>EXCLUDE</b> |
| Other                          | <input style="width: 20px;" type="checkbox"/> |           |                |

**STAGE 2: Stability : in last 24 hours before treatment withdrawal discussed with family**

|                                                                                                                                                  |                          |           |                |
|--------------------------------------------------------------------------------------------------------------------------------------------------|--------------------------|-----------|----------------|
| Unstable: i.e. patient observations show significant variability/deterioration or introduction of new therapy as result of patient deterioration | <input type="checkbox"/> | (details) | <b>EXCLUDE</b> |
| Stable: i.e. patient observations show no variability/deterioration and no introduction of new therapy as result of patient deterioration        | <input type="checkbox"/> |           |                |

**Stage 3: Observations in the last 24 hours before withdrawal discussed with family**

**State**

|                                                        |                          |             |                          |
|--------------------------------------------------------|--------------------------|-------------|--------------------------|
| Conscious (alert and orientated; GCS 15 or equivalent) | <input type="checkbox"/> | Unconscious | <input type="checkbox"/> |
|--------------------------------------------------------|--------------------------|-------------|--------------------------|

**Respiratory support**

|                                                                      |                          |                                                     |                          |
|----------------------------------------------------------------------|--------------------------|-----------------------------------------------------|--------------------------|
| Self-ventilating breathing air                                       | <input type="checkbox"/> | Self-ventilating on oxygen mask                     | <input type="checkbox"/> |
| Self-ventilating with room air/oxygen with endotracheal tube in situ | <input type="checkbox"/> | Self-ventilated with tracheostomy                   | <input type="checkbox"/> |
| Receiving non-invasive ventilation via mask                          | <input type="checkbox"/> | Receiving non-invasive ventilation via tracheostomy | <input type="checkbox"/> |
| Ventilated via a tracheostomy                                        | <input type="checkbox"/> | Ventilated via an endotracheal tube                 | <input type="checkbox"/> |

**Cardiovascular support**

|                                 |                          |                                                        |                          |
|---------------------------------|--------------------------|--------------------------------------------------------|--------------------------|
| No inotropes/vasopressors       | <input type="checkbox"/> | Single inotrope/vasopressor (excluding renal dopamine) | <input type="checkbox"/> |
| Single dopamine                 | <input type="checkbox"/> | Single inotrope/vasopressor with renal dopamine        | <input type="checkbox"/> |
| Multiple inotropes/vasopressors | <input type="checkbox"/> |                                                        |                          |

**Care/Environmental factors**

|                                                                                                      |                          |  |
|------------------------------------------------------------------------------------------------------|--------------------------|--|
| Coroners cases/police involvement                                                                    | <input type="checkbox"/> |  |
| Family with complex issues that might prevent discharge                                              | <input type="checkbox"/> |  |
| Intense manual handling (e.g. morbid obesity, unstable spine)                                        | <input type="checkbox"/> |  |
| High gastrointestinal losses requiring intensive nursing care (e.g. diarrhoea, wound loss, vomiting) | <input type="checkbox"/> |  |
